# Supplementary material
Source: publisher figshare collection journal article supplement (https://frontiersin.figshare.com/ndownloader/files/20322252)

Appendices

Appendix A. Relationship ‘true’ score and error variance after truncation and rounding

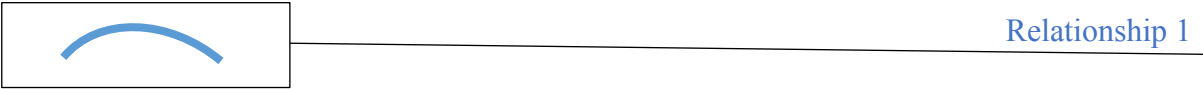

12 items

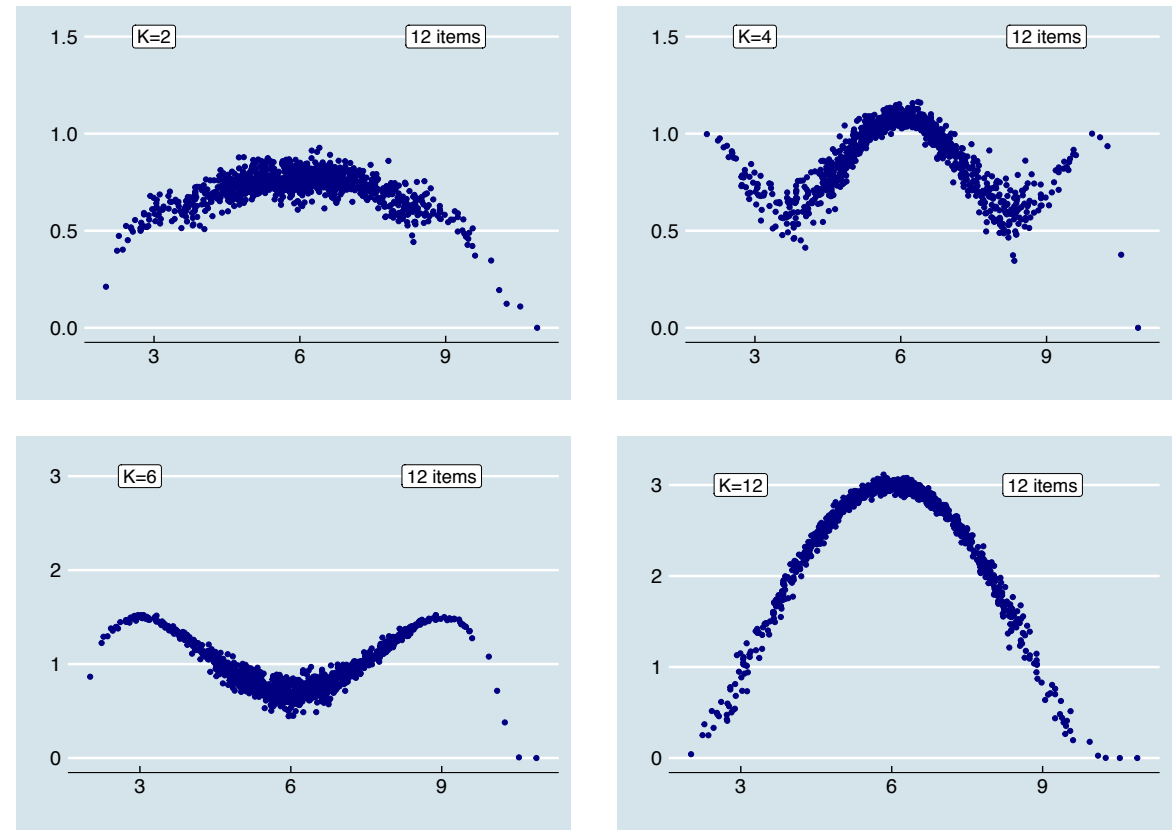

**24 items**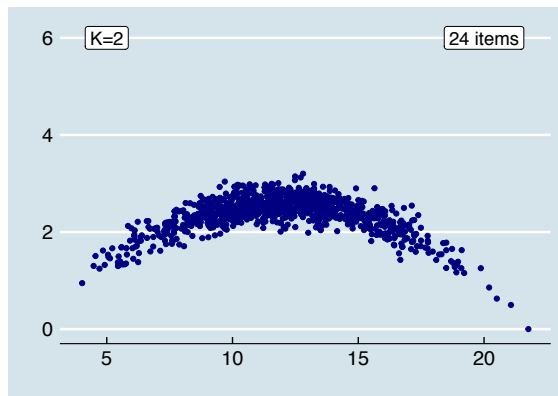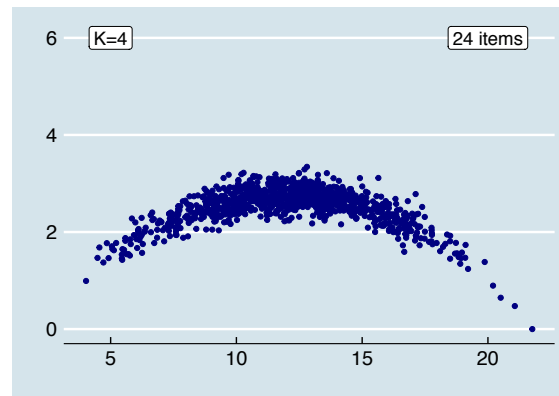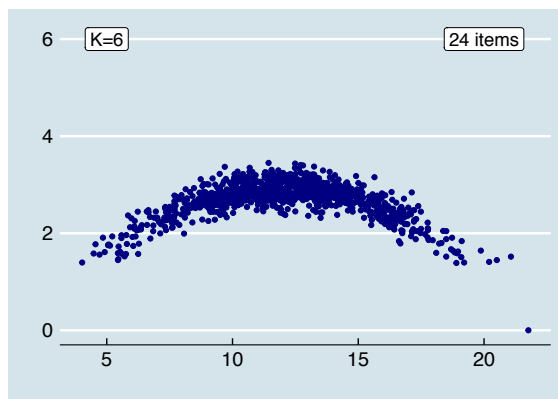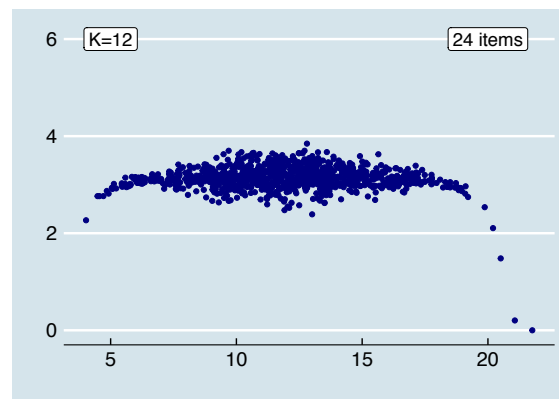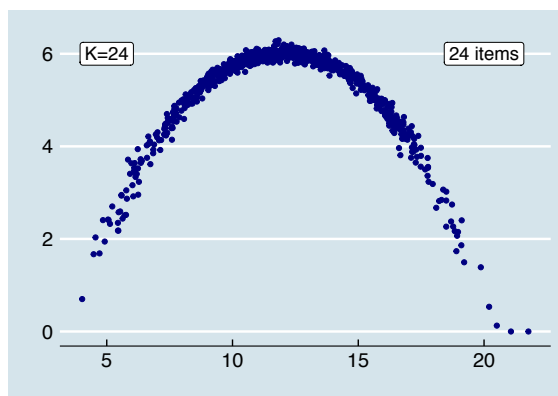

**48 items**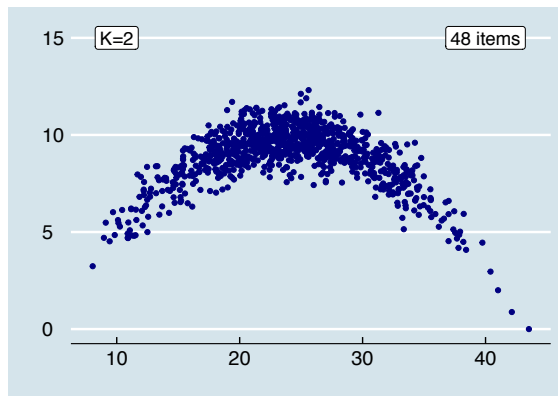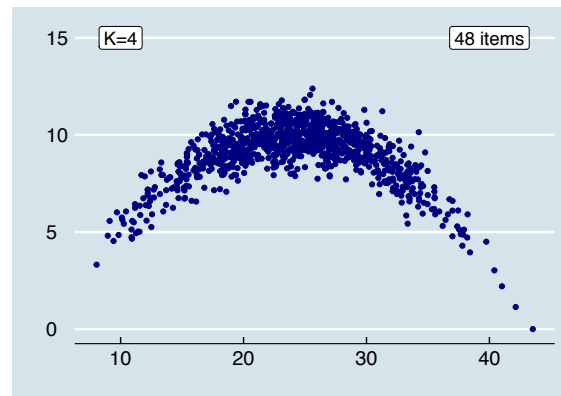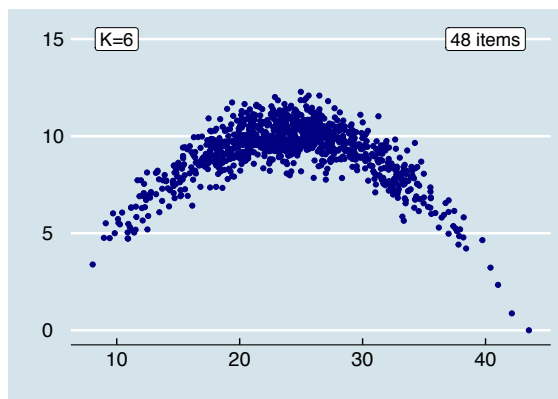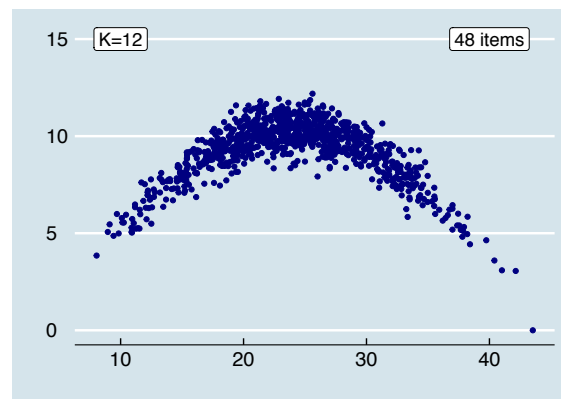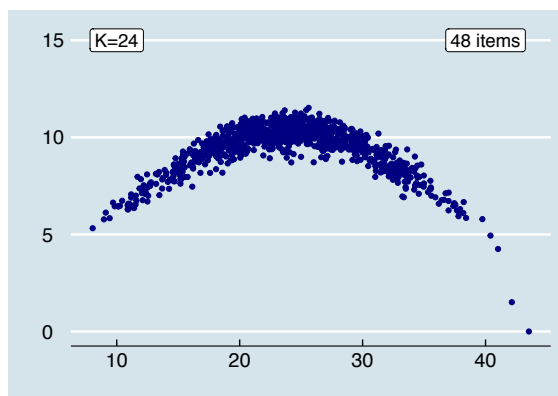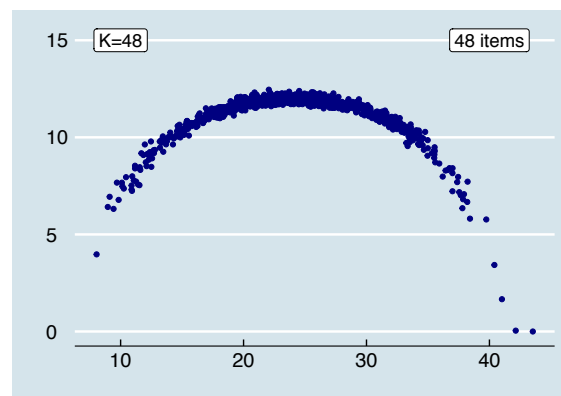

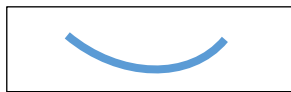

Relationship 2

**12 items**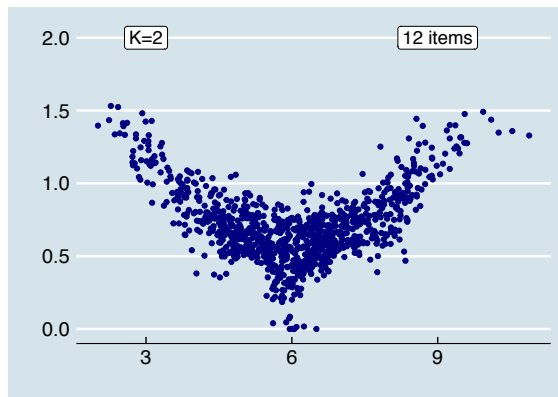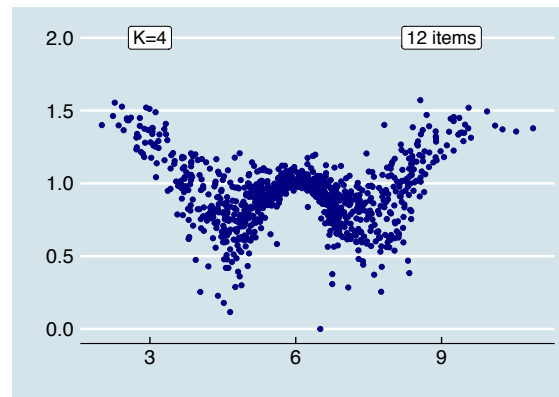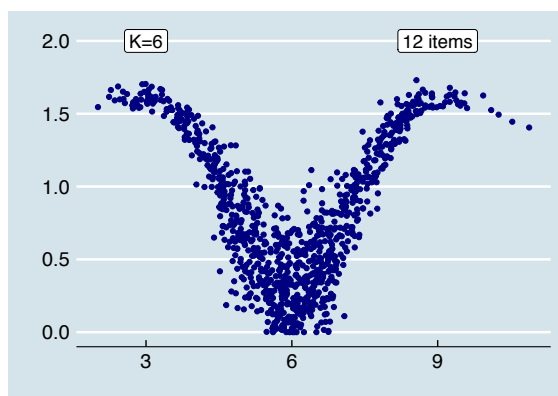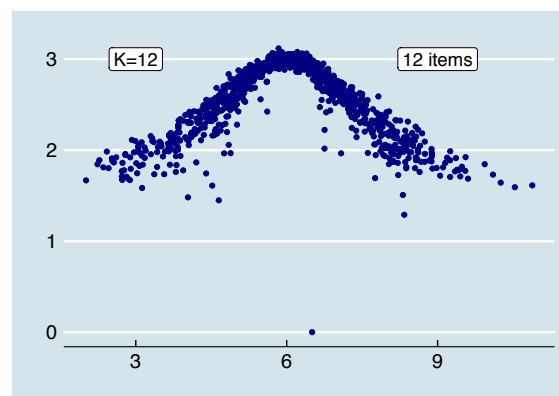



**24 items**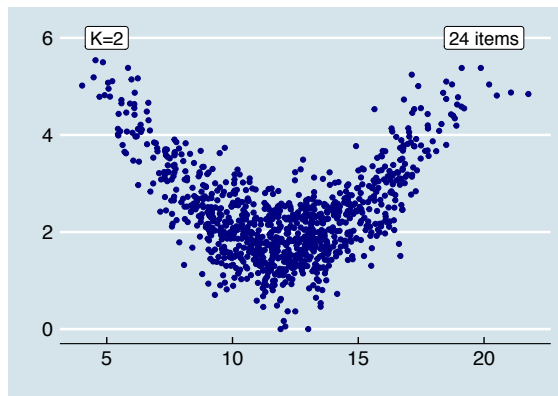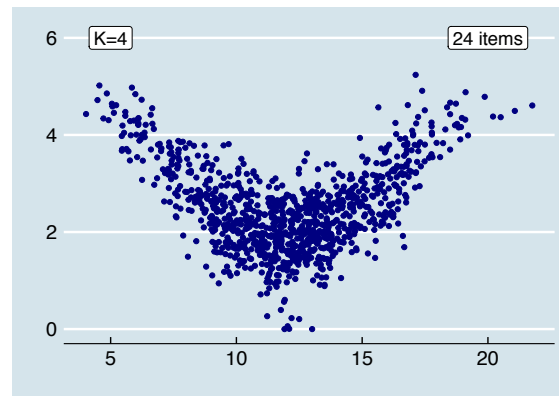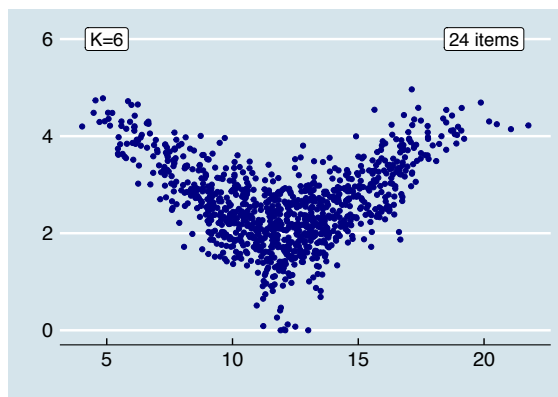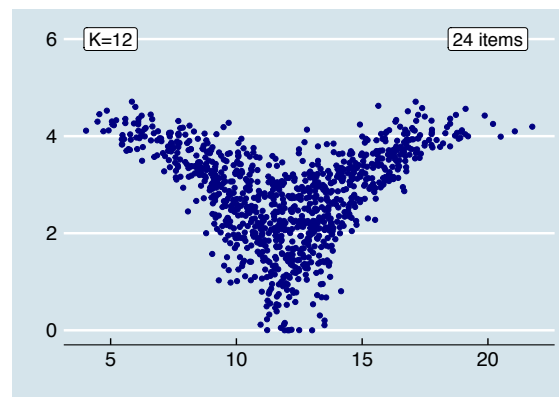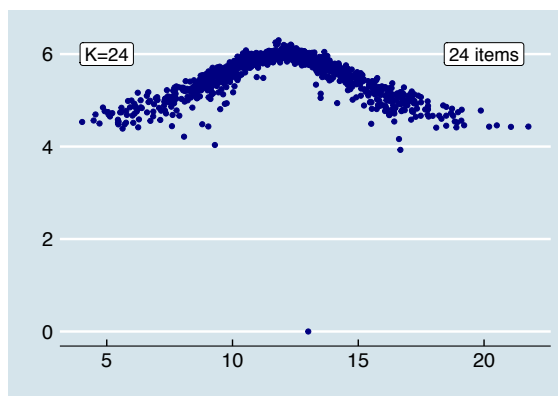

**48 items**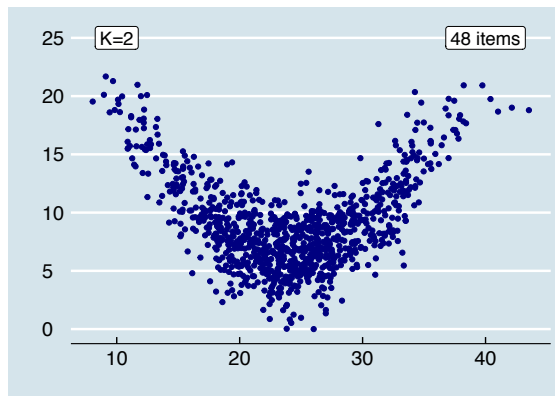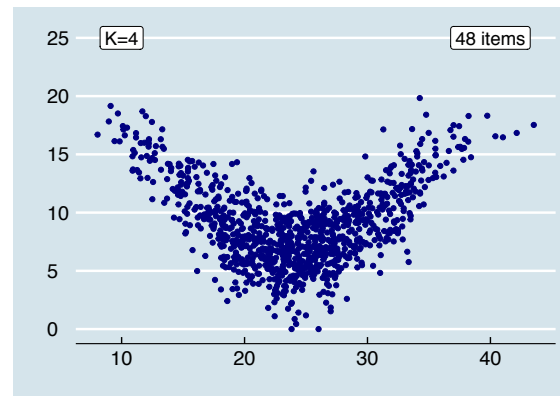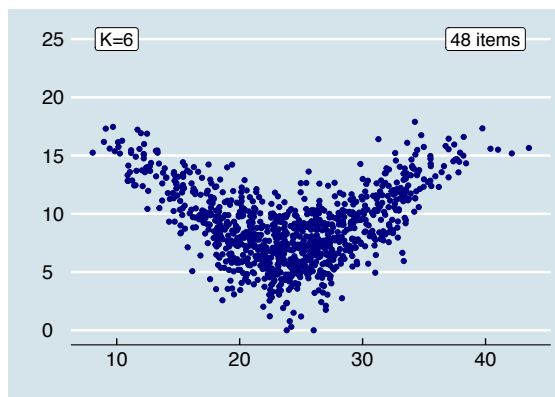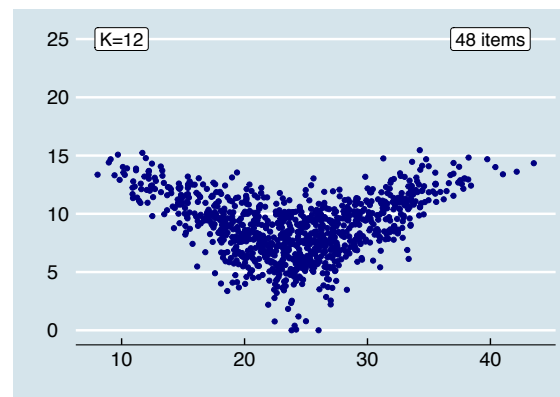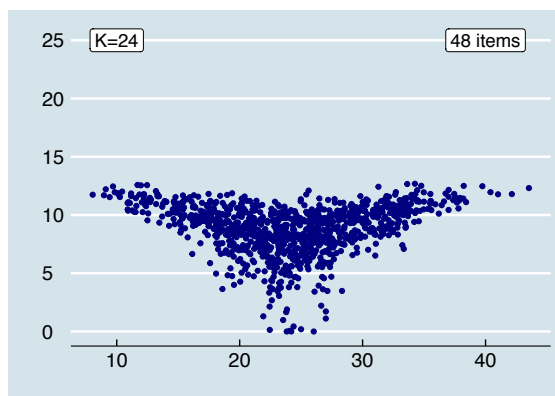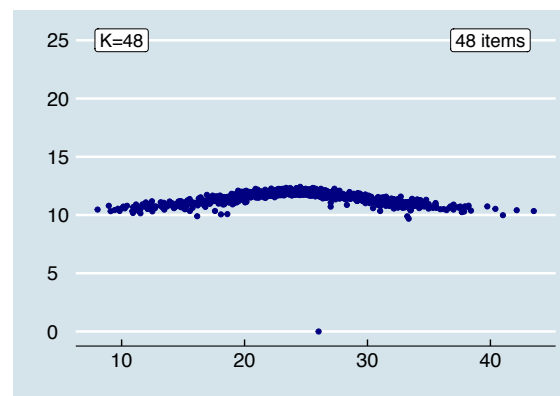

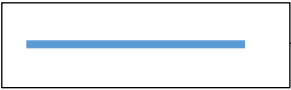

Relationship 3

12 items

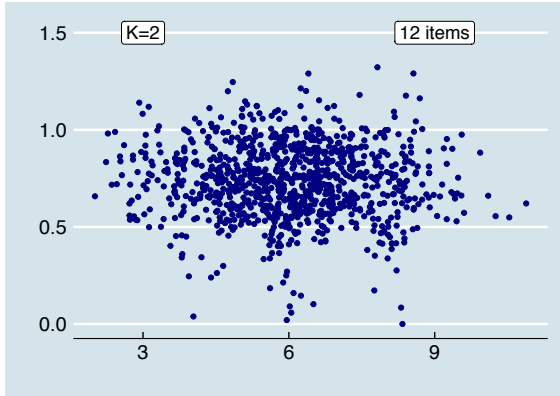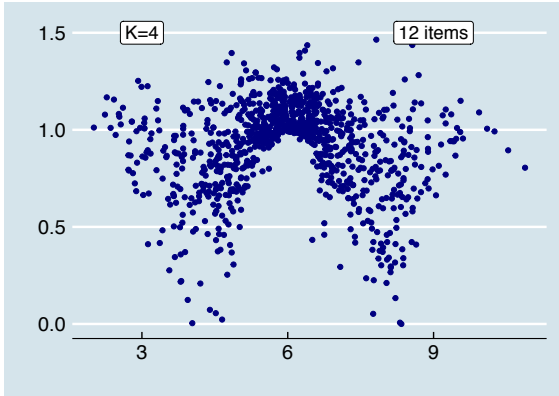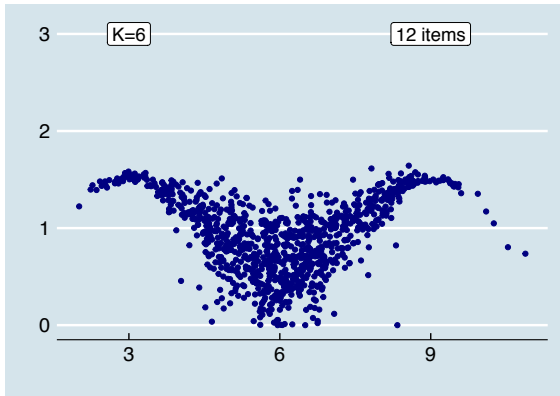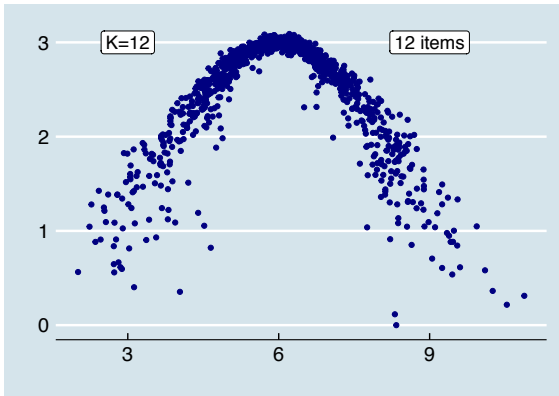

**24 items**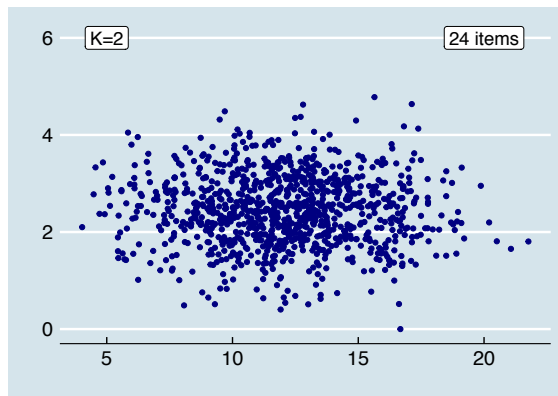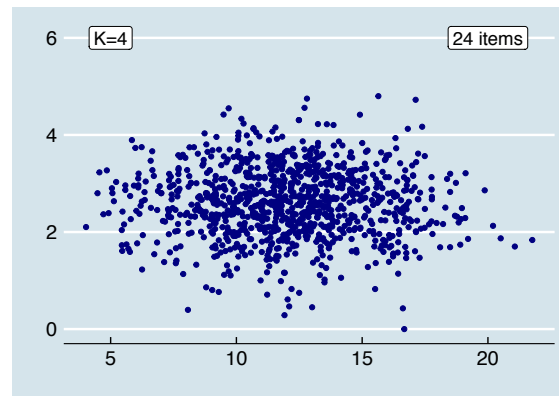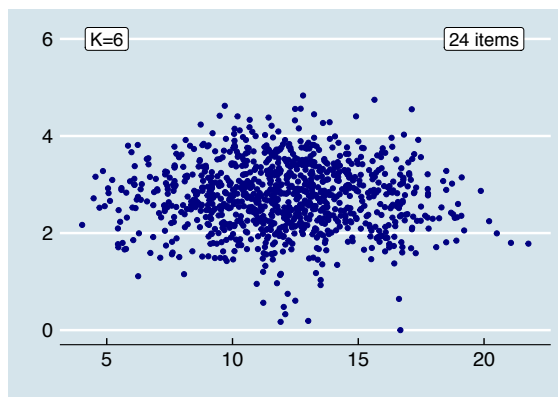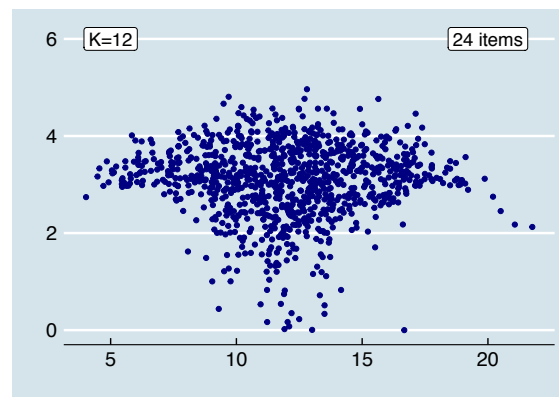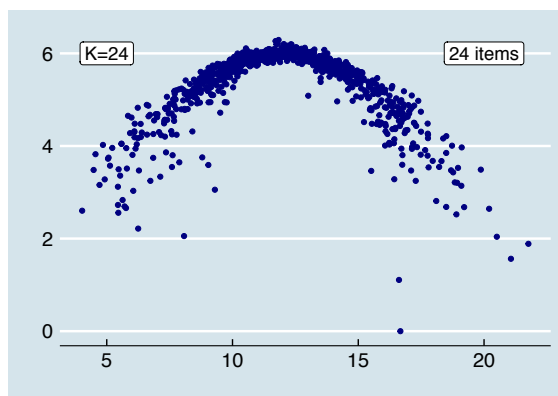

**48 items**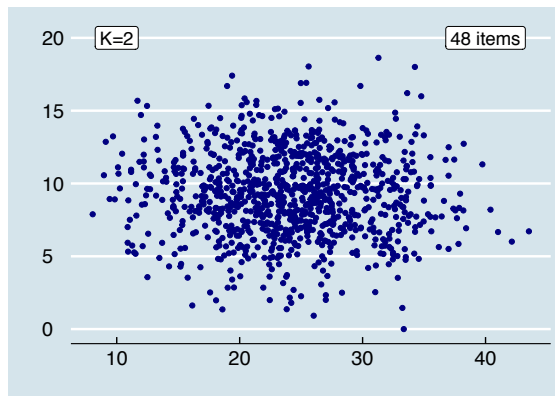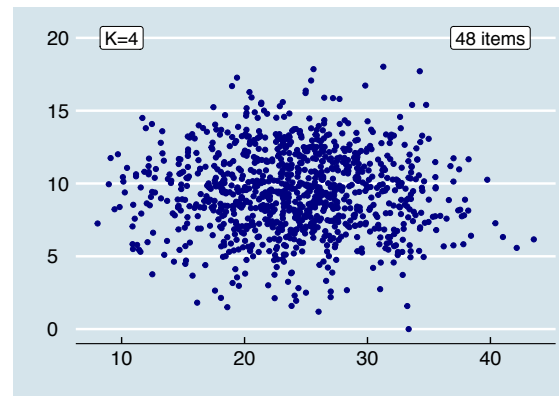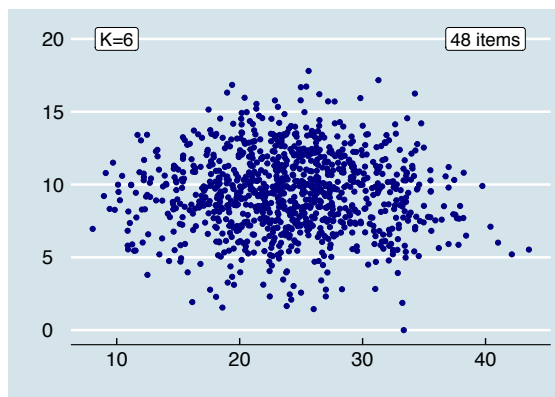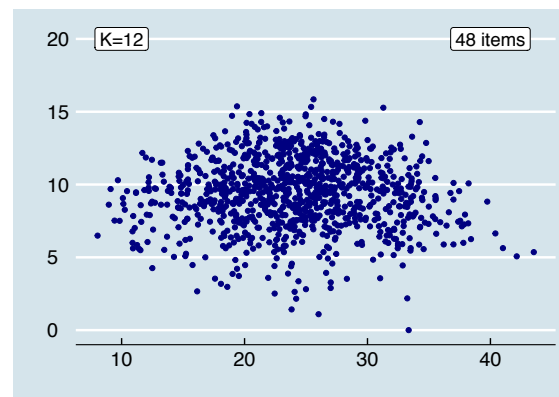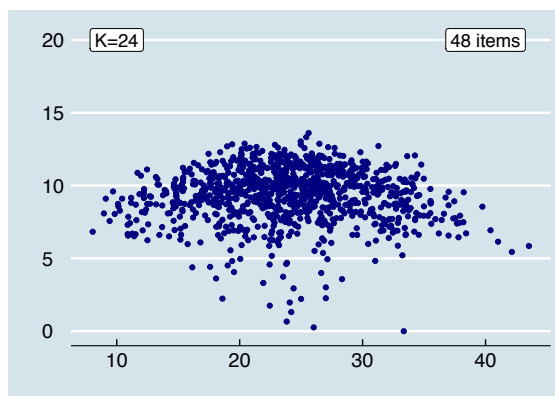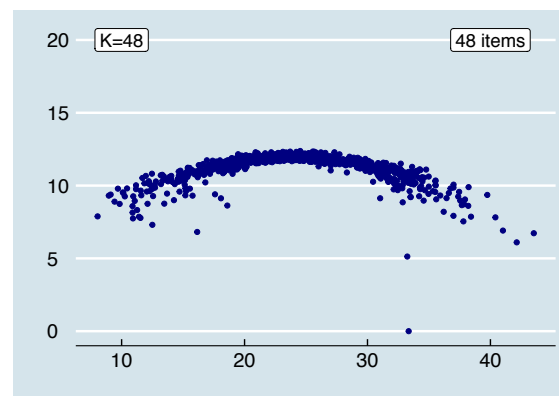

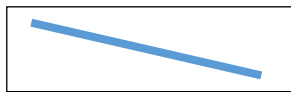

Relationship 4

**12 items**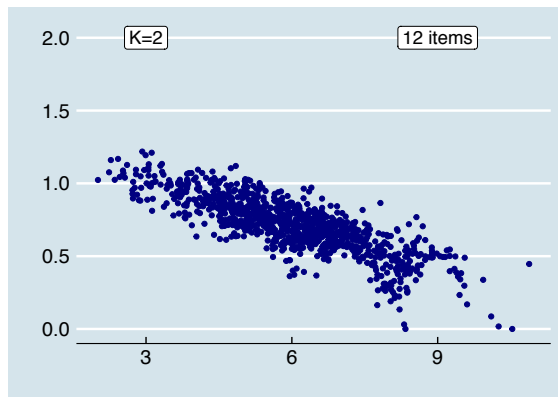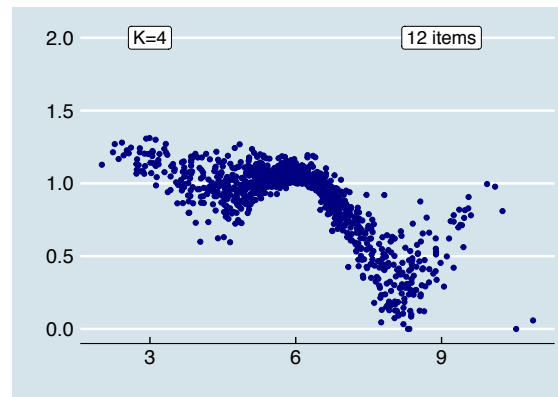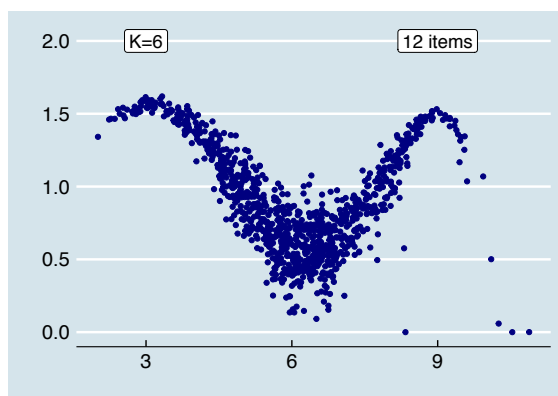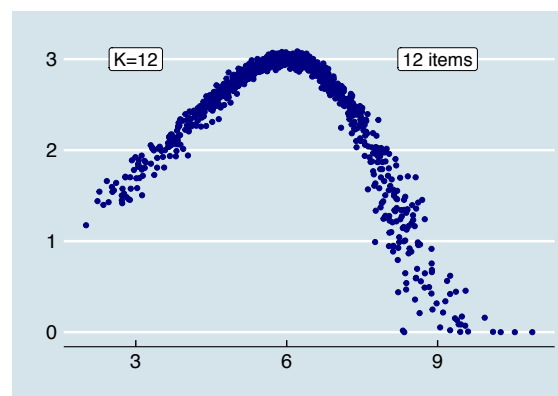

**24 items**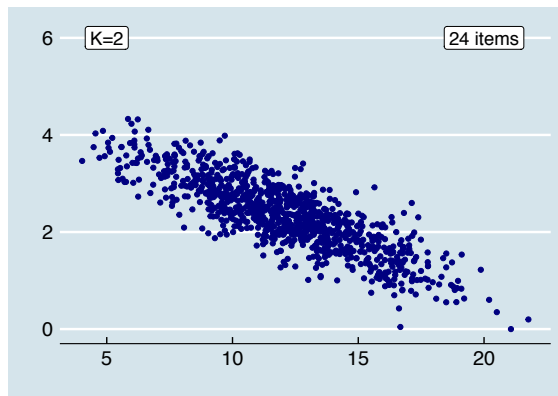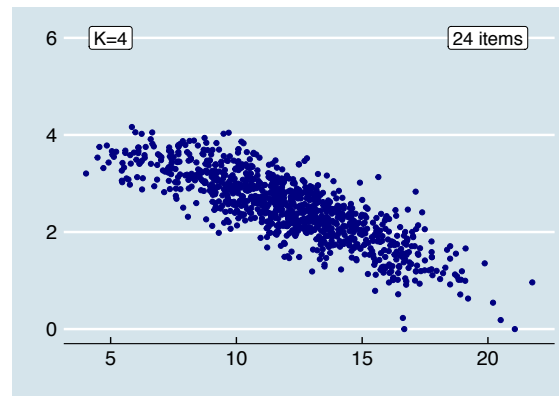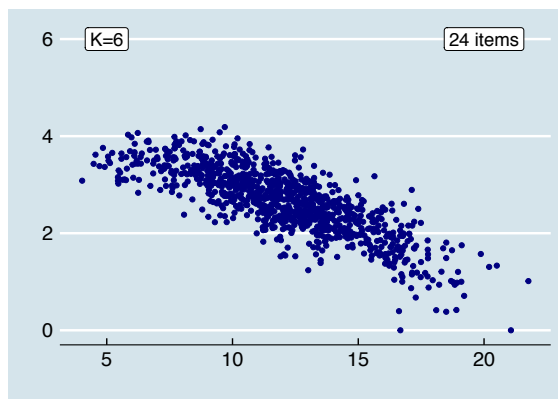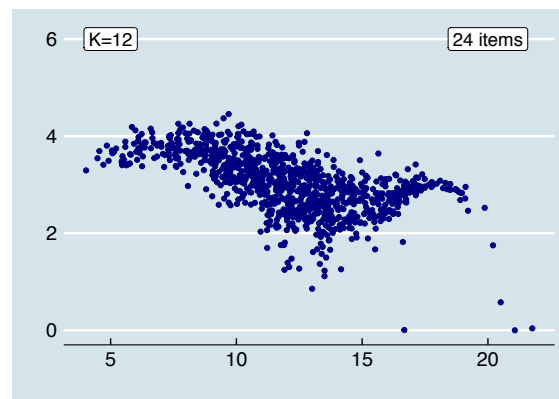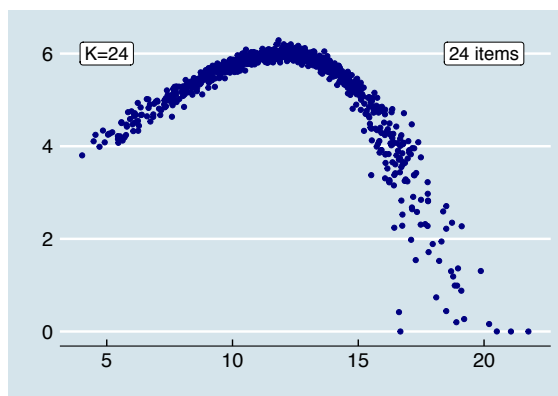

**48 items**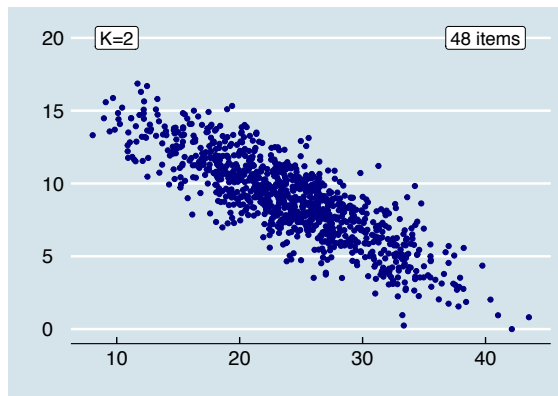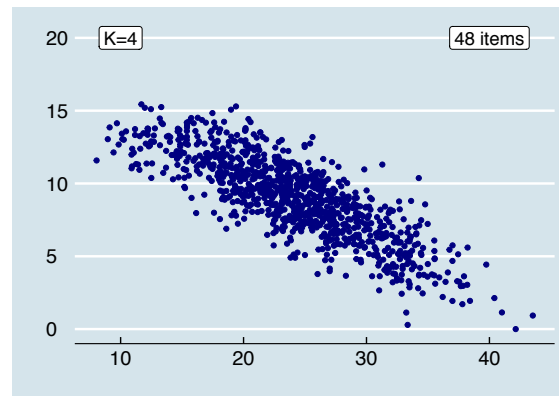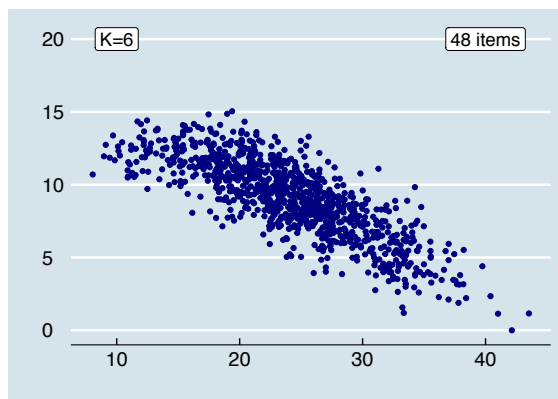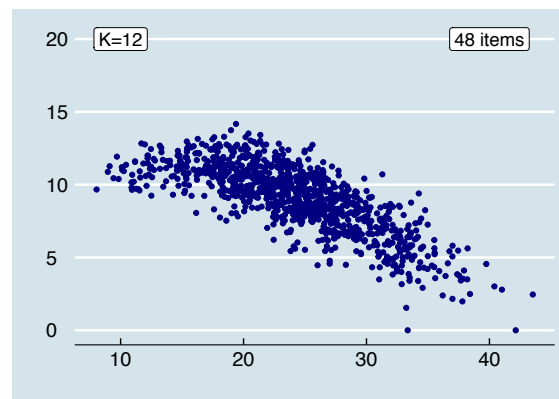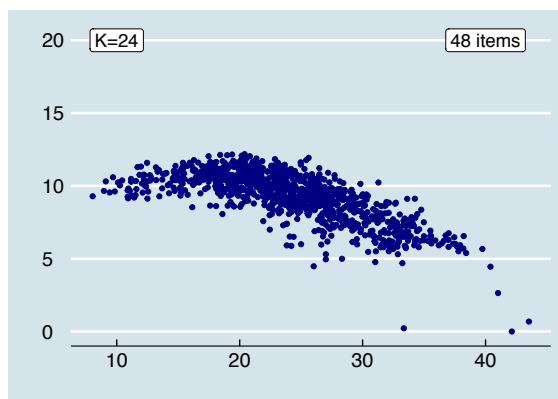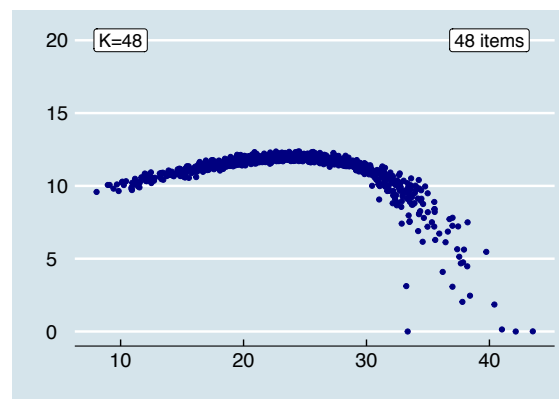



**Appendix B.**

## Number of options of the between variance

**24 items**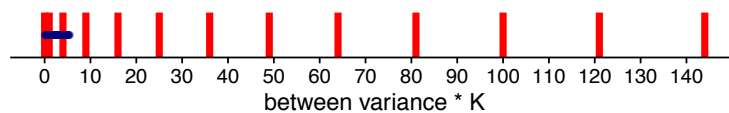(a)  $K = 2$ 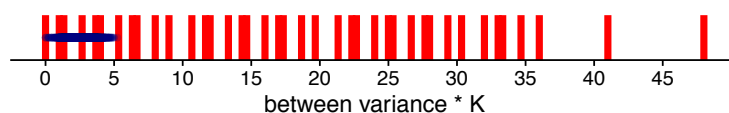(b)  $K = 4$ 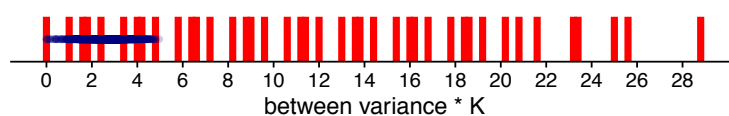(c)  $K = 6$ 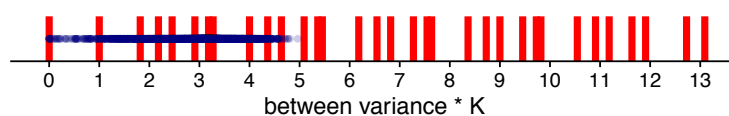(d)  $K = 12$ 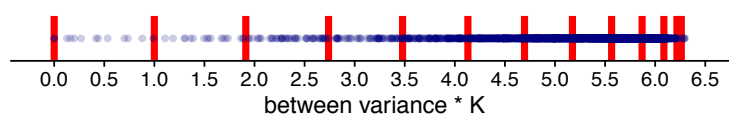(e)  $K = 24$ **48 items**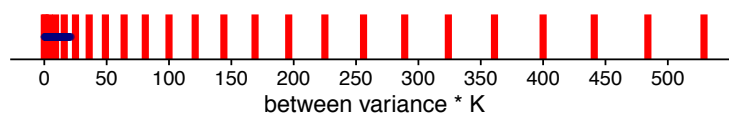(a)  $K = 2$ 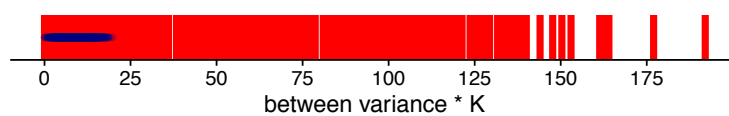(b)  $K = 4$

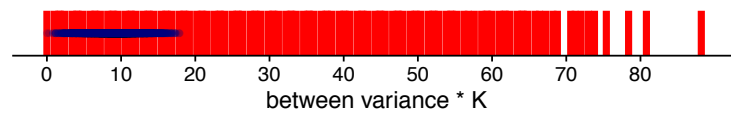(c)  $K = 6$ 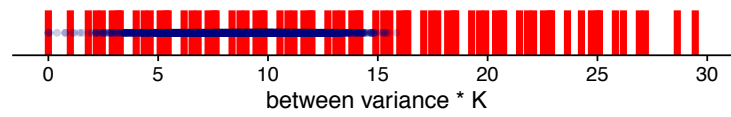(d)  $K = 12$

Appendix C.

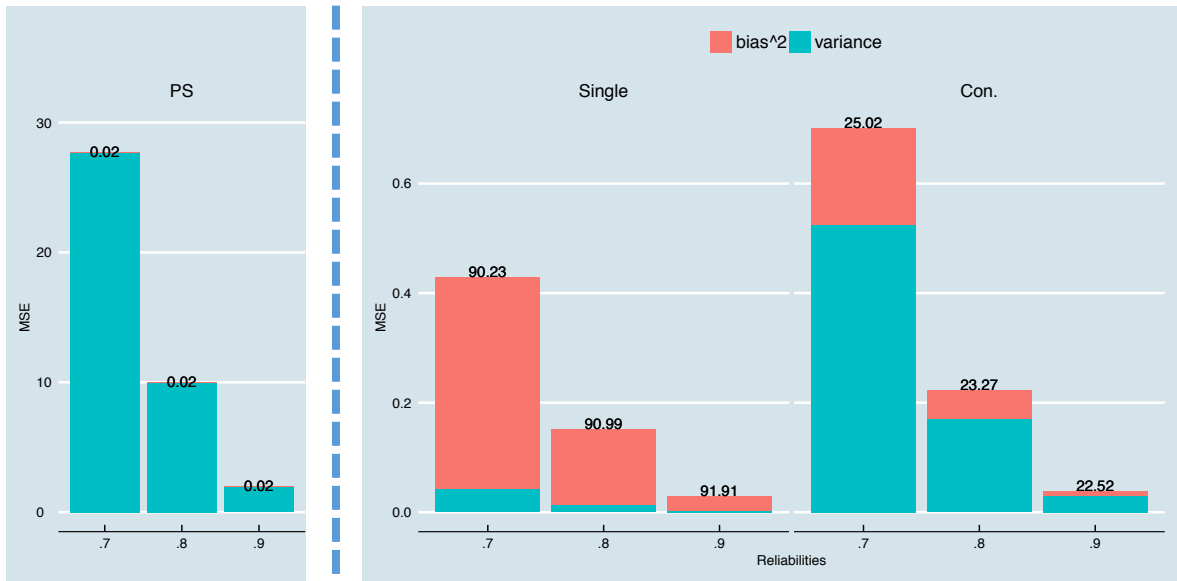

(a) K=2

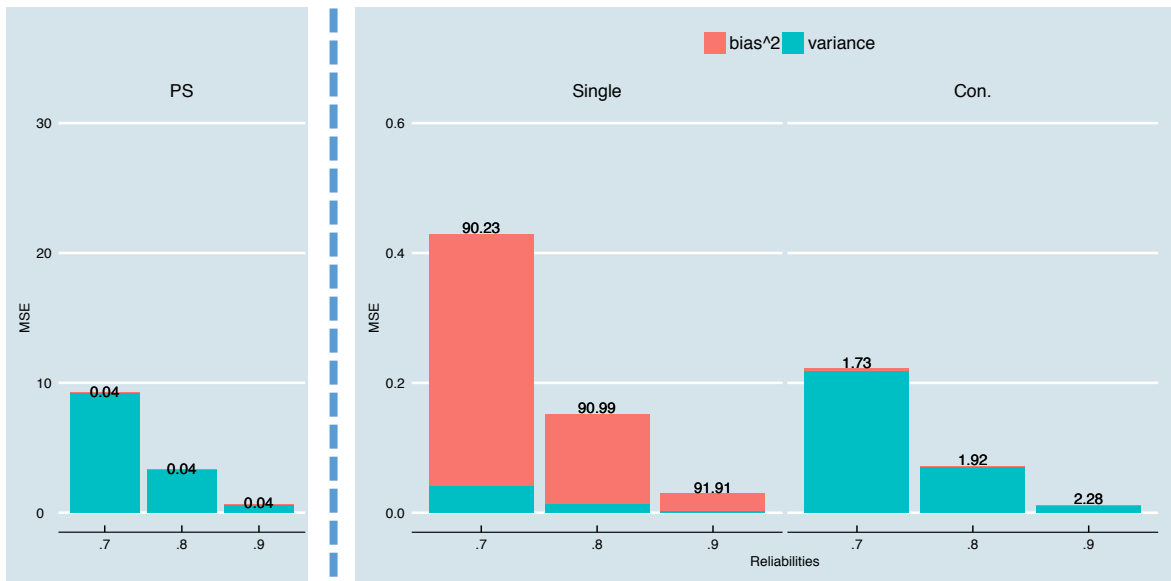

(b) K=4

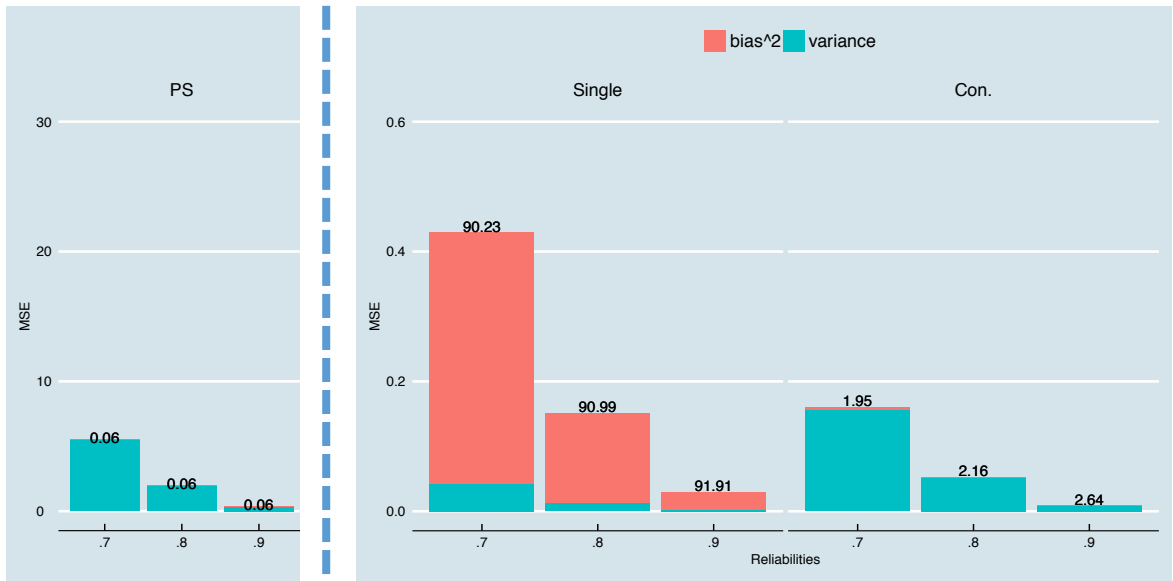

(c) K=6

Appendix D.

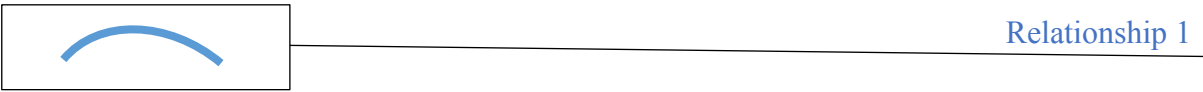

% bias, after 10,000 test takes

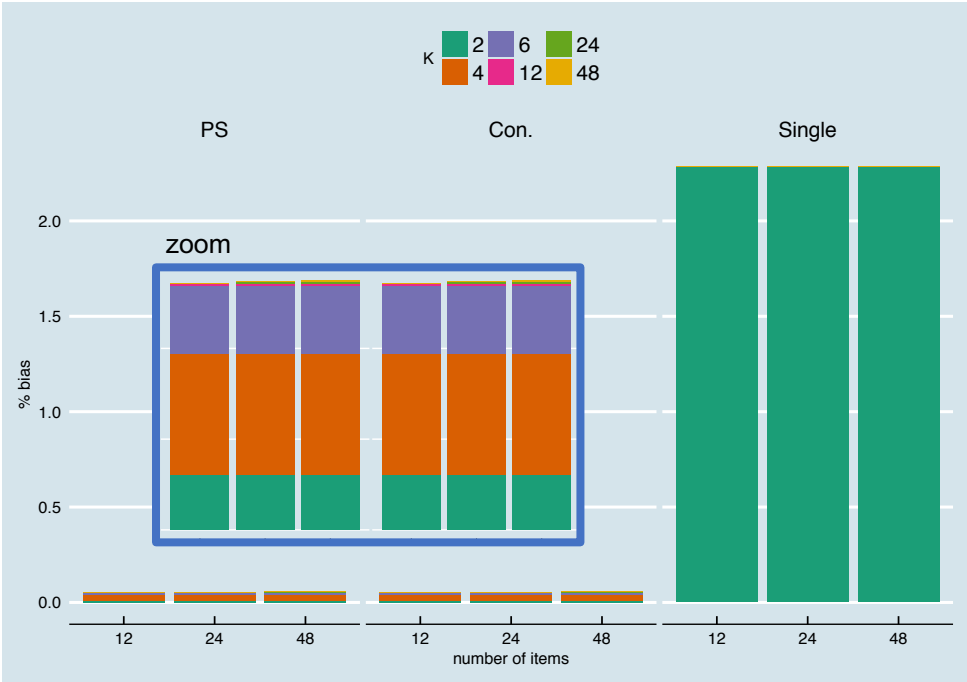

(a) Based on continuous parallel test scores

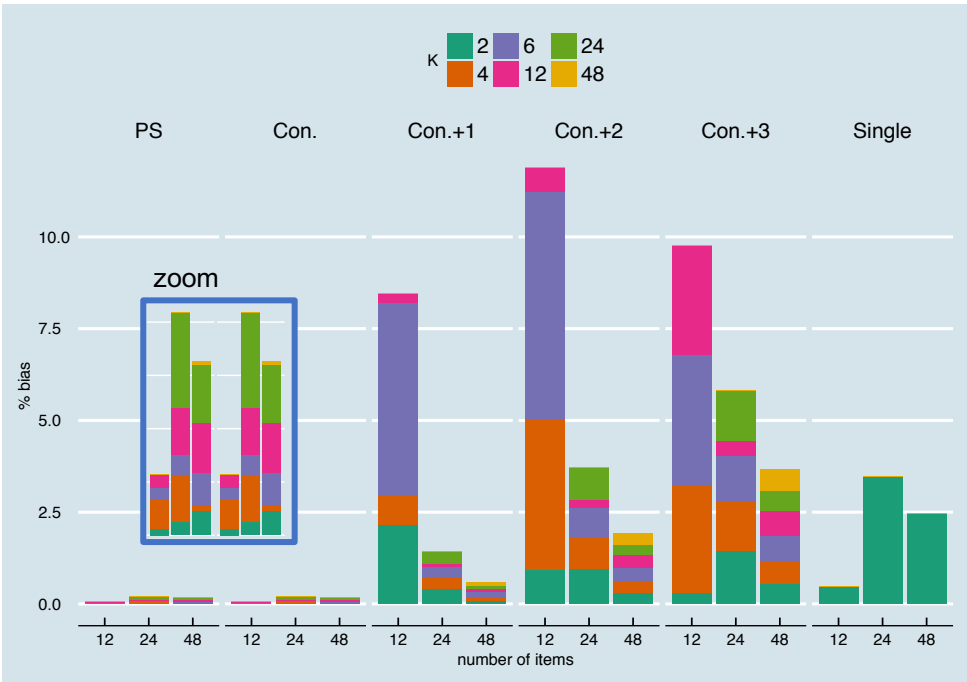

(b) Based on rounded and truncated parallel test scores

Coefficient of variation, after 10,000 test takes

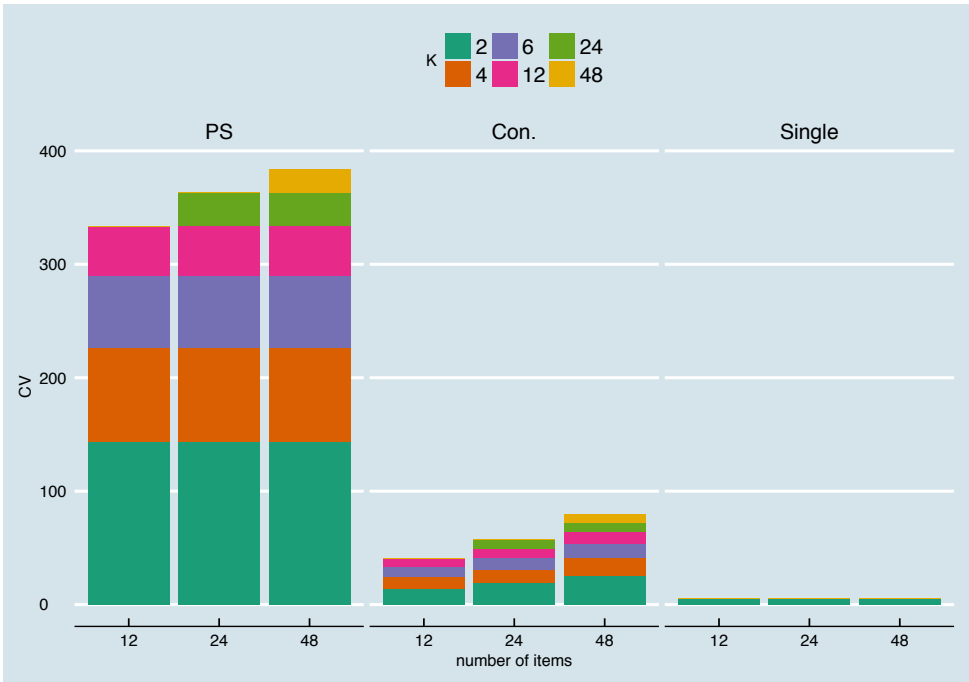

(a) Based on continuous parallel test scores

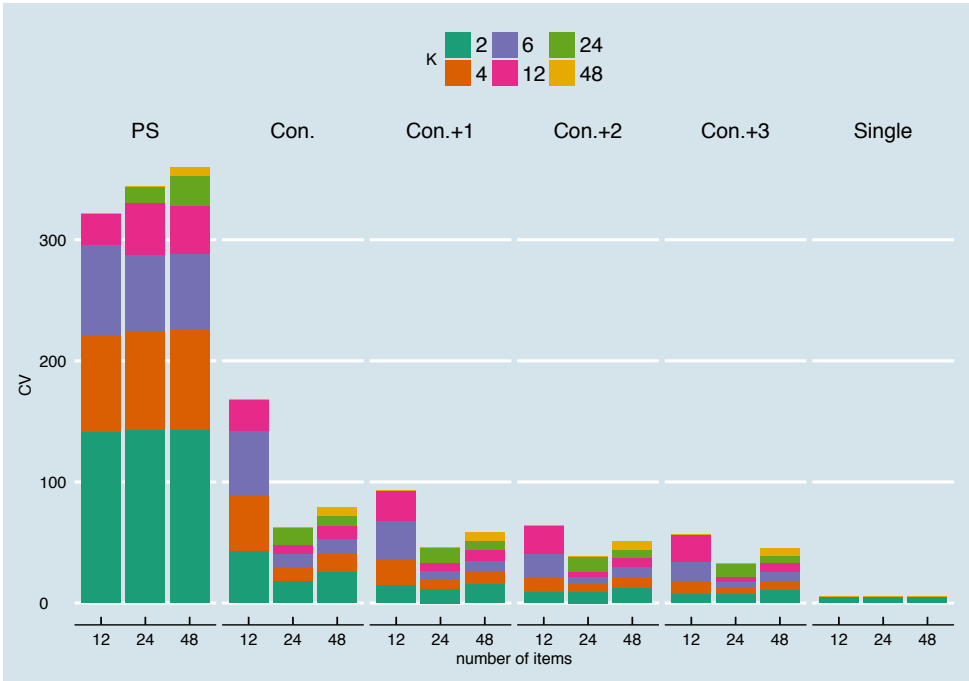

(b) Based on rounded and truncated parallel test scores

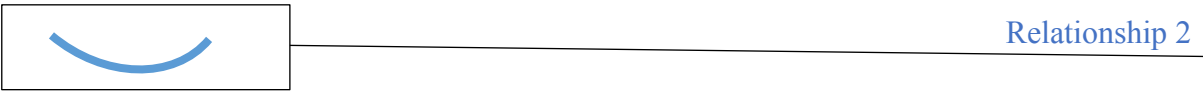

% bias, after 10,000 test takes

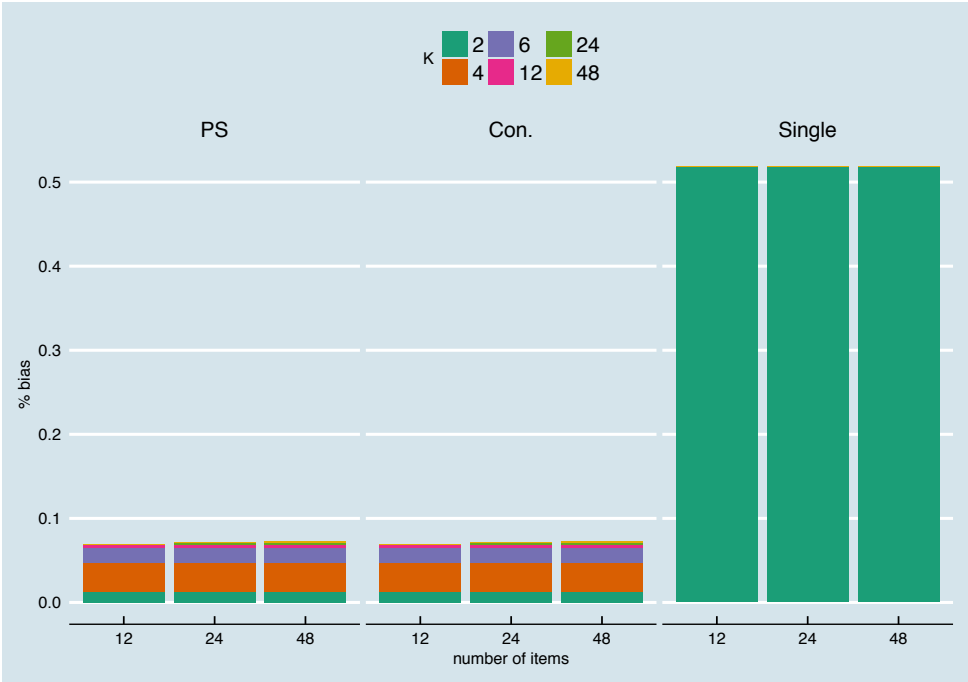

(a) Based on continuous parallel test scores

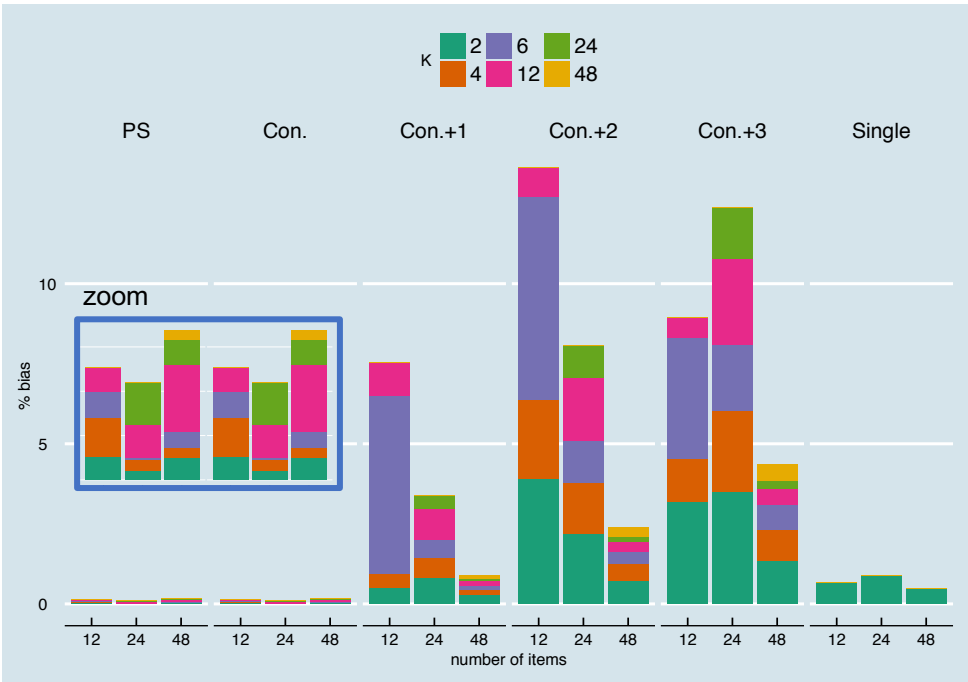

(b) Based on rounded and truncated parallel test scores

Coefficient of variation, after 10,000 test takes

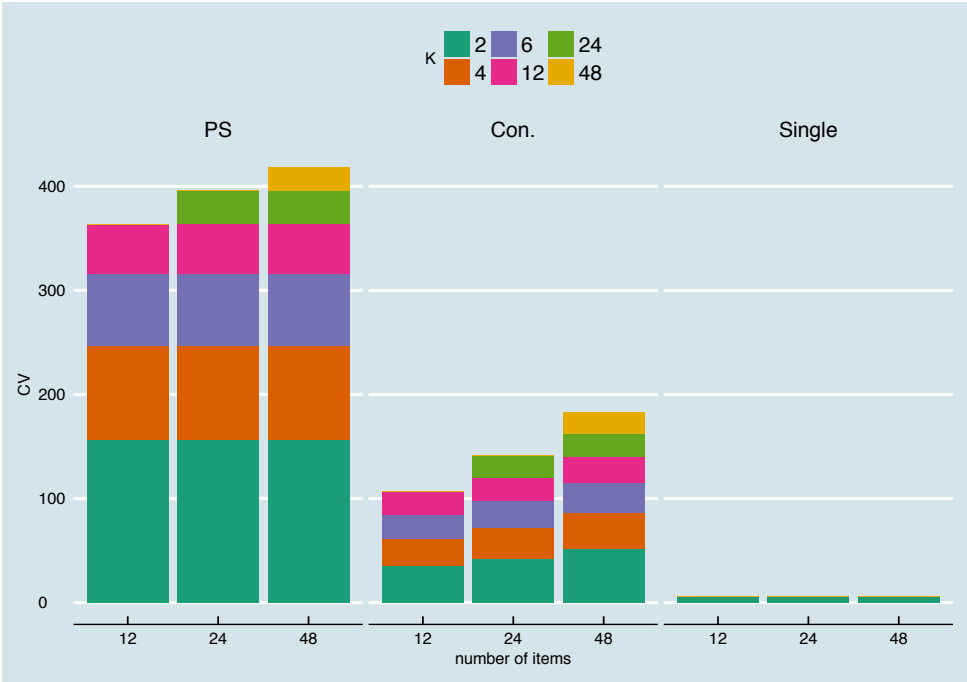

(a) Based on continuous parallel test scores

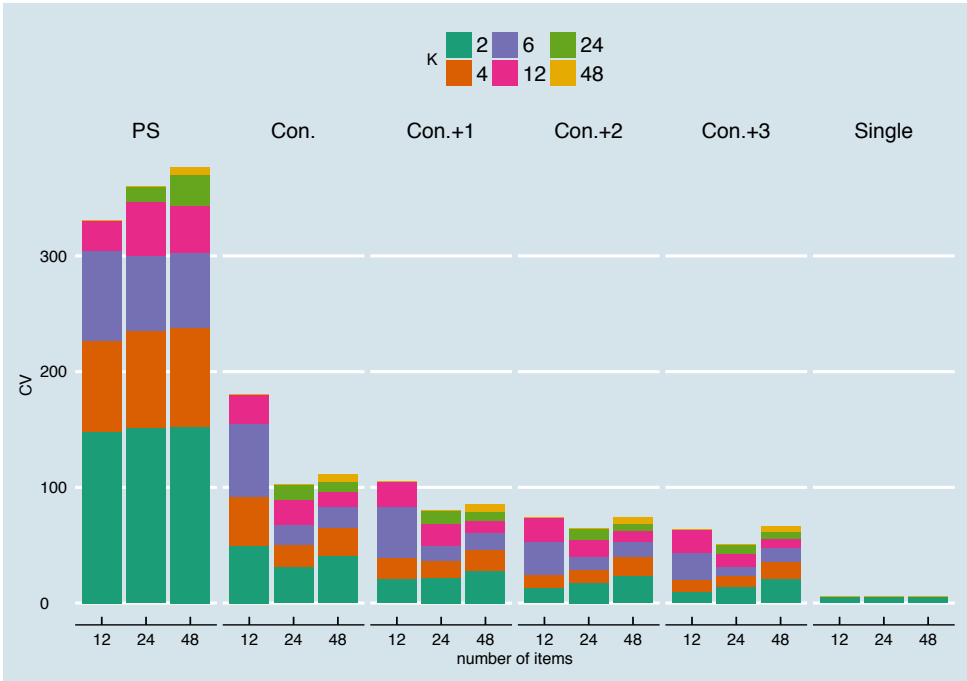

(b) Based on rounded and truncated parallel test scores



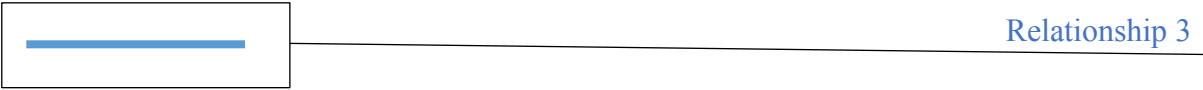

% bias, after 10,000 test takes

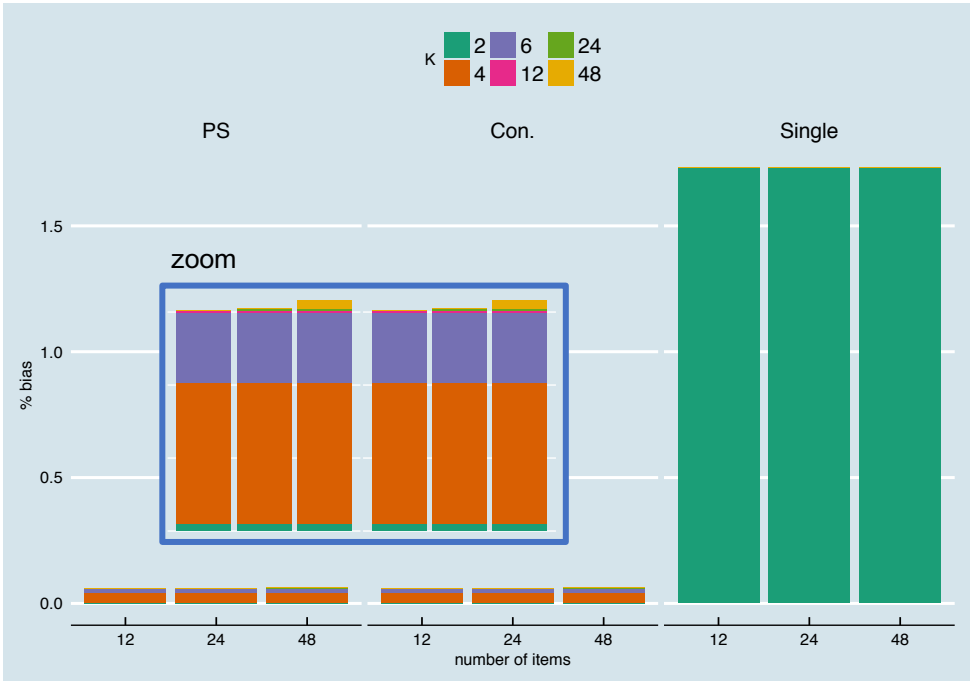

(a) Based on continuous parallel test scores

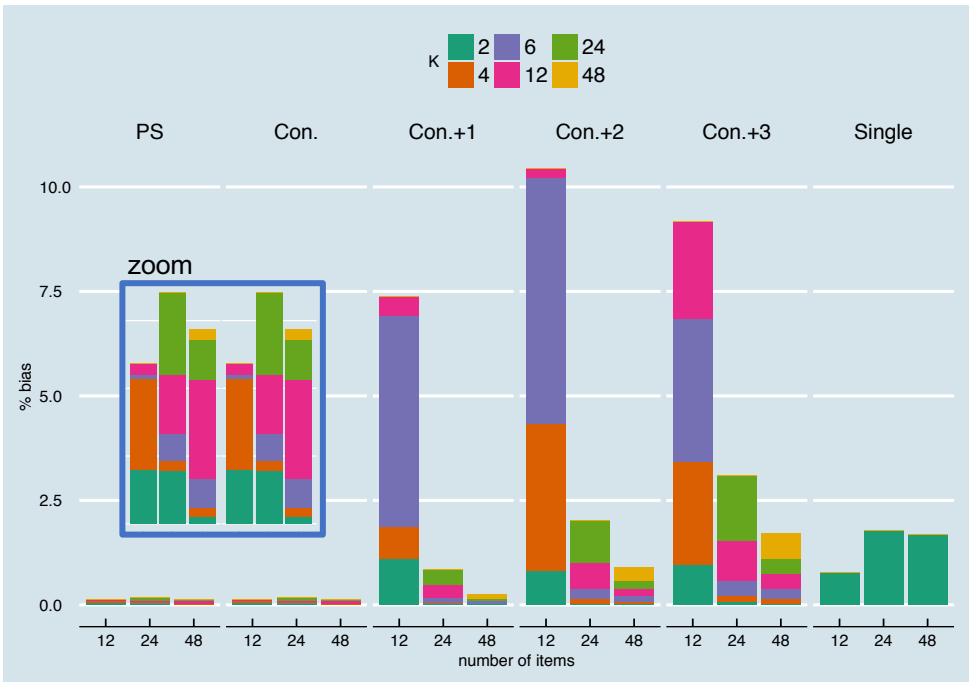

(b) Based on rounded and truncated parallel test scores

Coefficient of variation, after 10,000 test takes

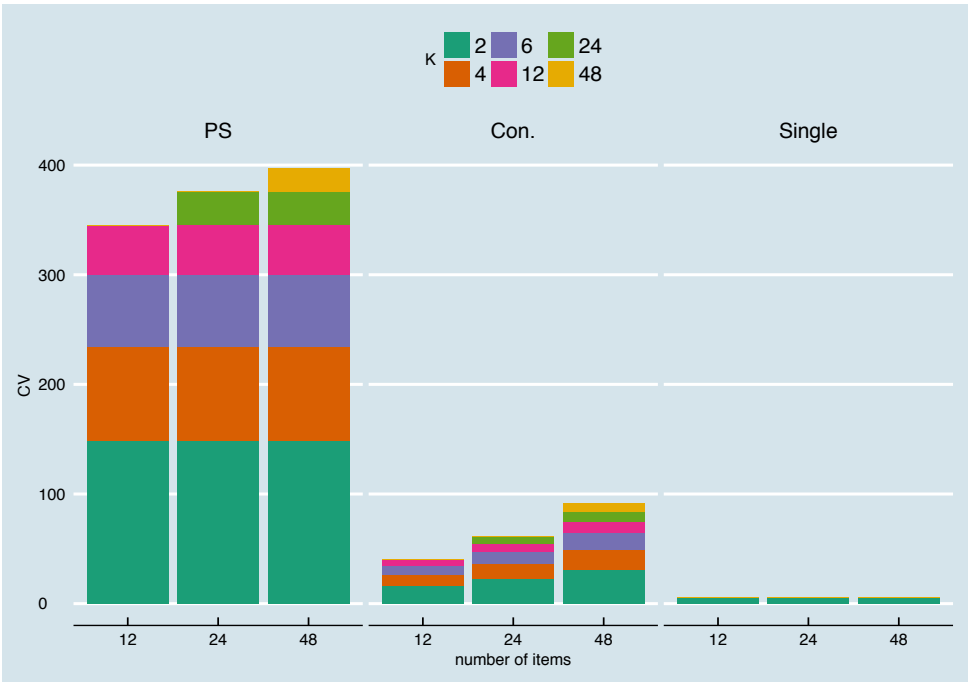

(a) Based on continuous parallel test scores

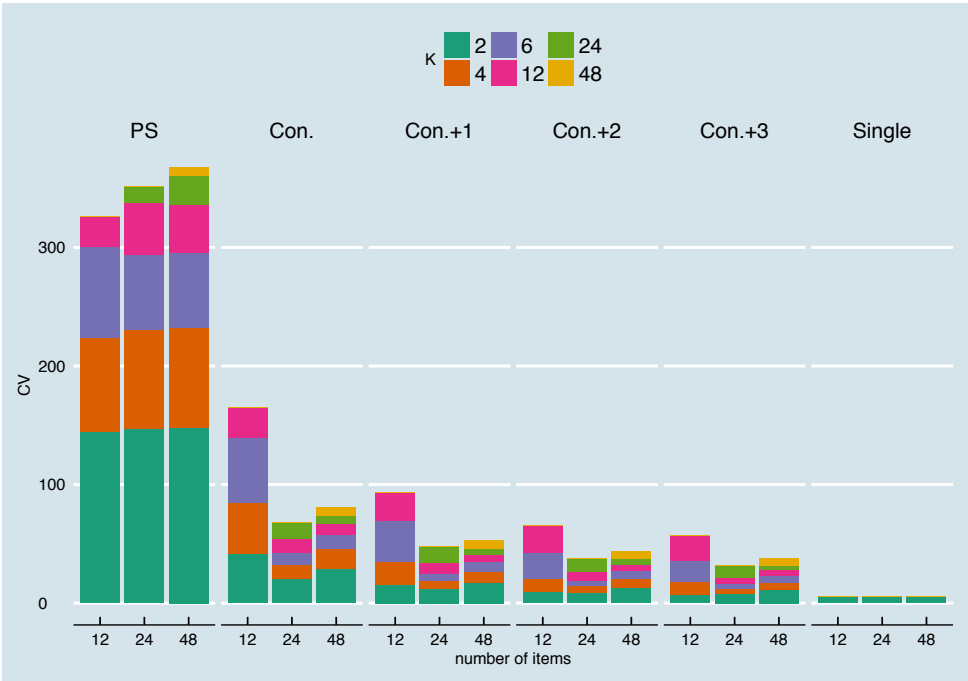

(b) Based on rounded and truncated parallel test scores

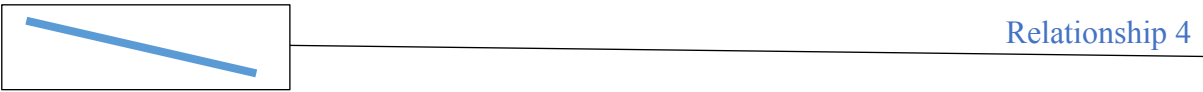

% bias, after 10,000 test takes

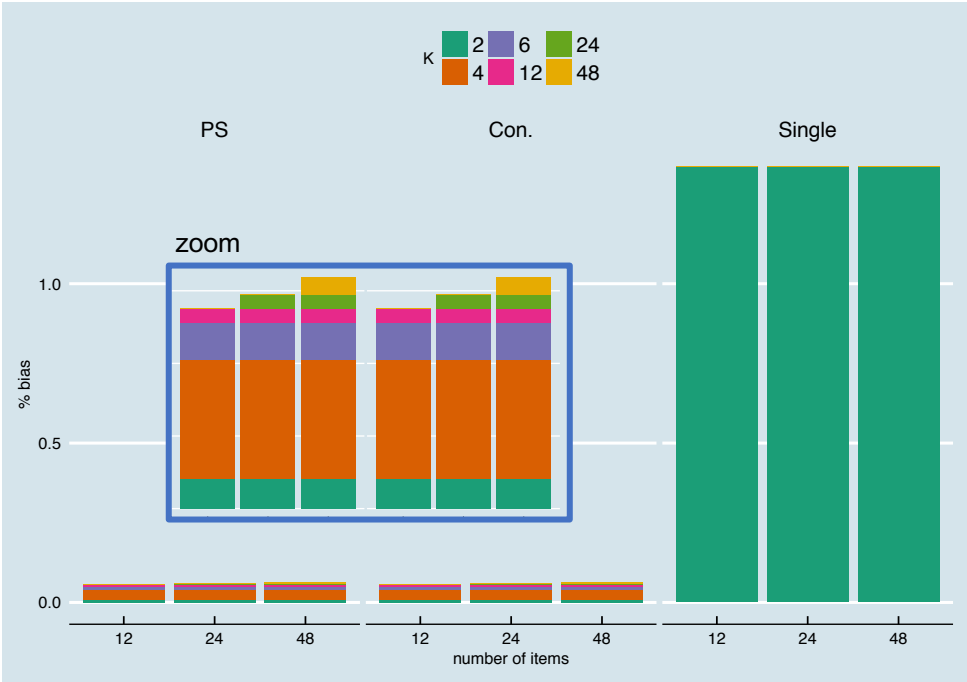

(a) Based on continuous parallel test scores

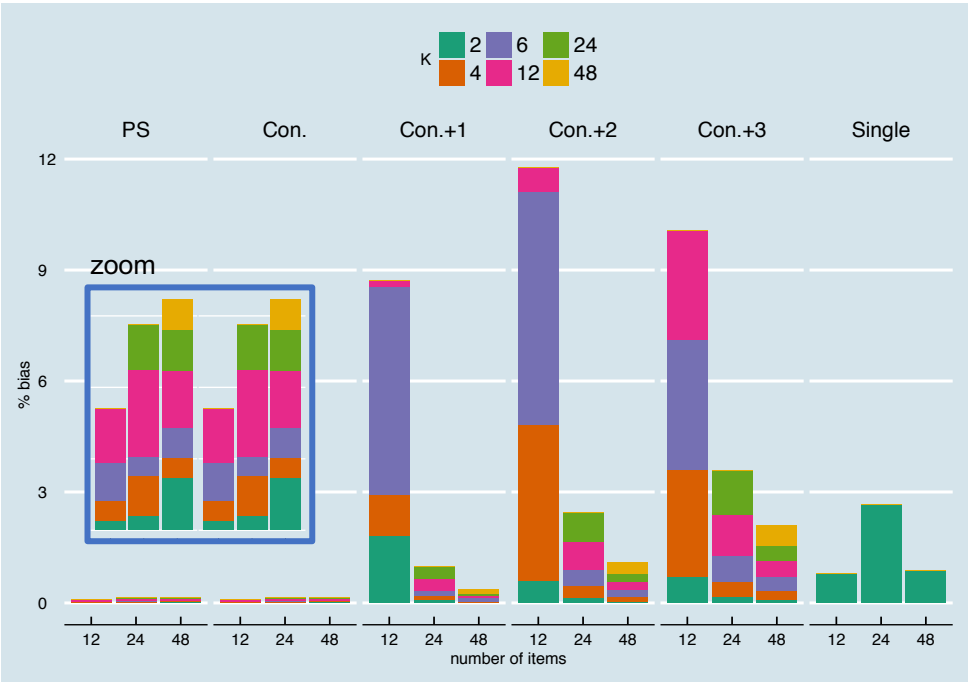

(b) Based on rounded and truncated parallel test scores

Coefficient of variation, after 10,000 test takes

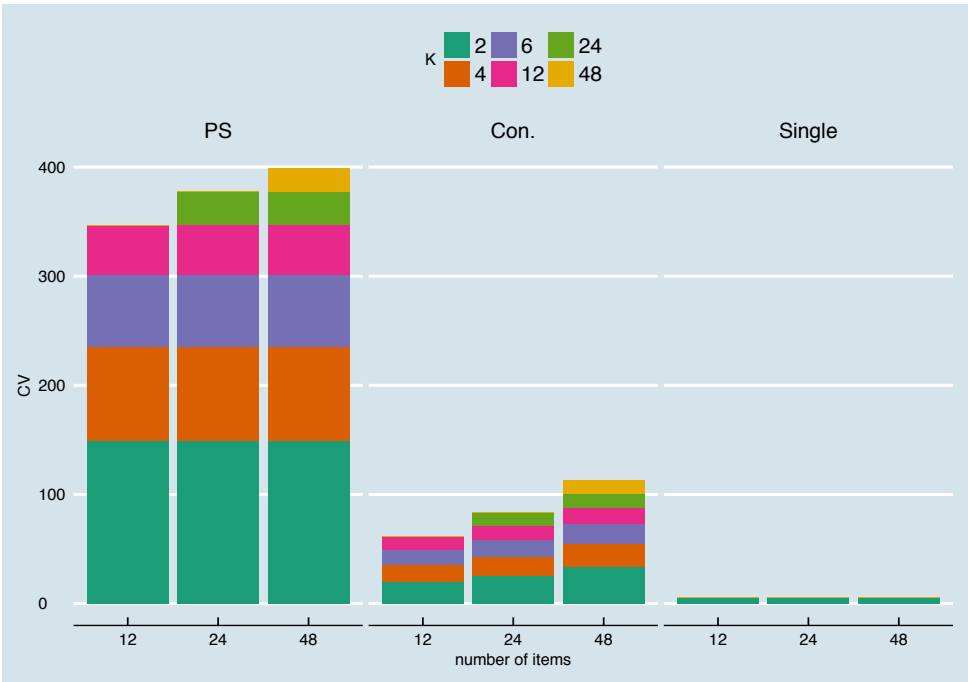

(a) Based on continuous parallel test scores

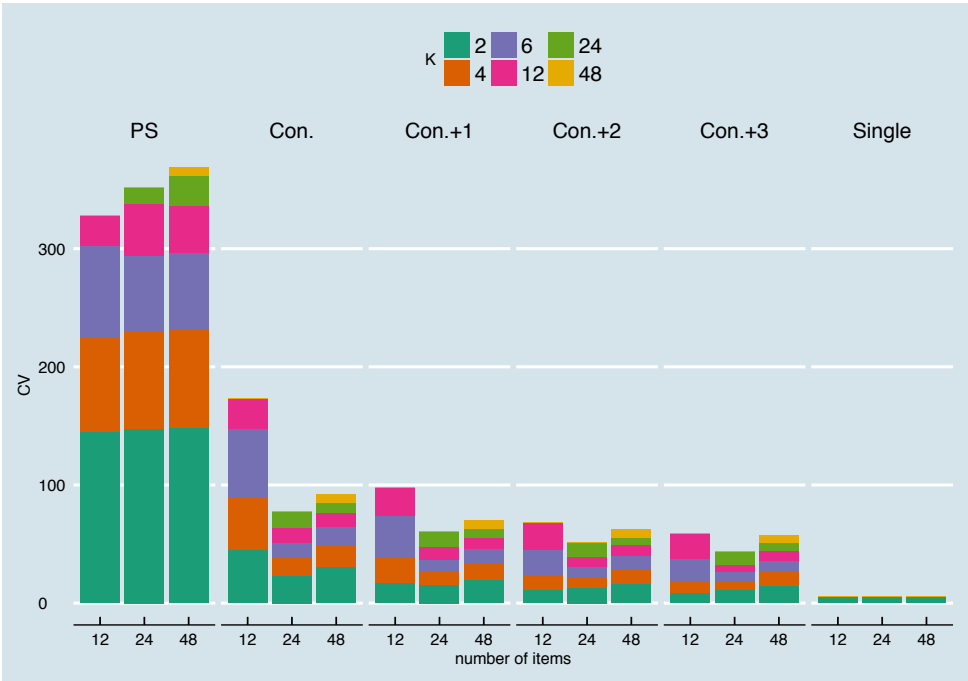

(b) Based on rounded and truncated parallel test scores

## Appendix E.

12 items,  $K = 2$ , continuous parallel test scores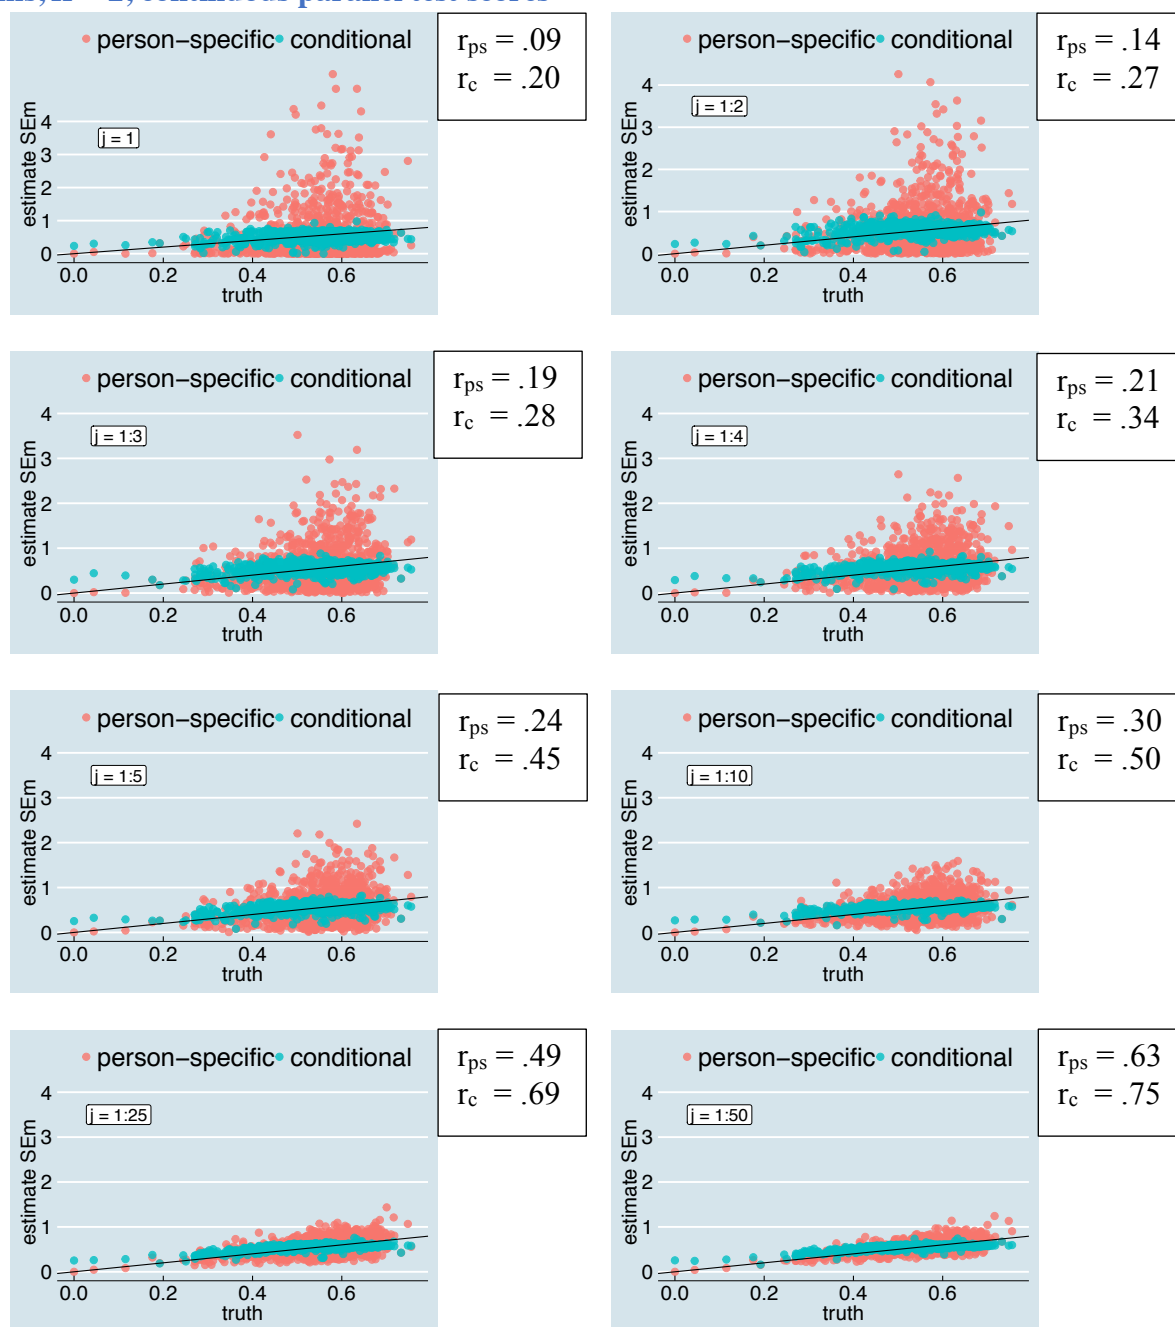

Within standard deviation for truth = .6 vs between standard deviation

| $J$                 | 1   | 2   | 3   | 4   | 5   | 10  | 25  | 50  |
|---------------------|-----|-----|-----|-----|-----|-----|-----|-----|
| Person-specific SEM |     |     |     |     |     |     |     |     |
| within              | .69 | .57 | .44 | .42 | .37 | .26 | .17 | .12 |
| between             | .74 | .60 | .49 | .41 | .37 | .26 | .18 | .15 |
| Conditional SEM     |     |     |     |     |     |     |     |     |
| within              | .10 | .07 | .06 | .05 | .05 | .03 | .03 | .03 |
| between             | .12 | .11 | .10 | .09 | .09 | .06 | .06 | .05 |

**12 items,  $K = 2$ , truncated and rounded parallel test scores**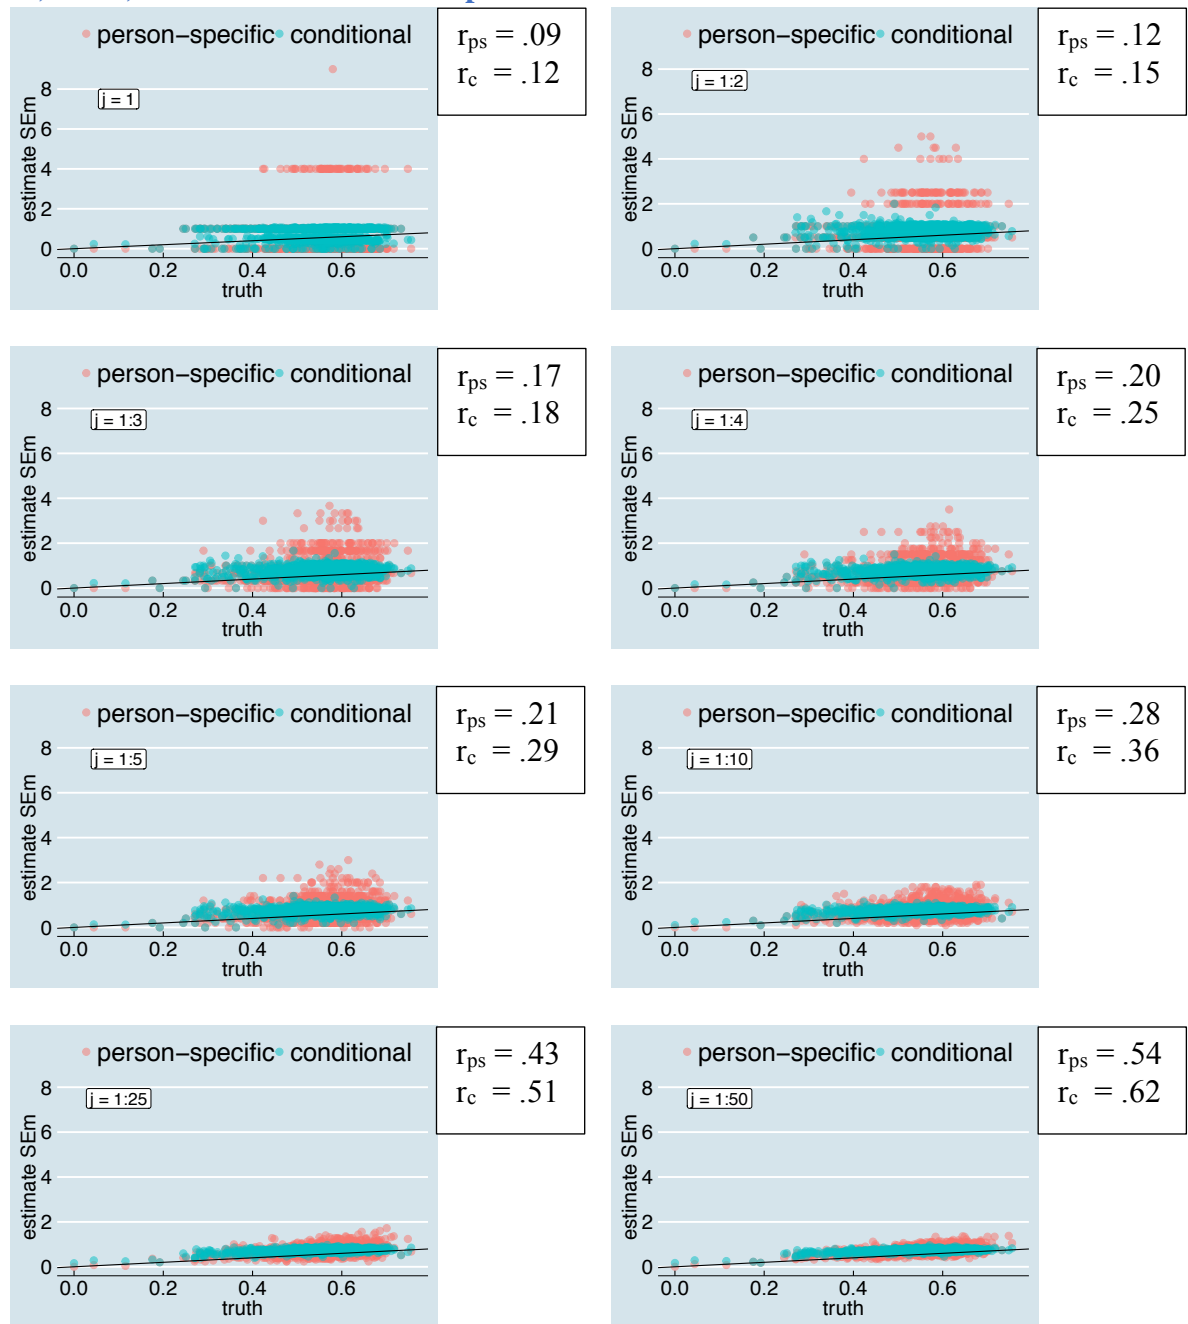

Within standard deviation for truth = .6 vs between standard deviation

| $J$                 | 1   | 2   | 3   | 4   | 5   | 10  | 25  | 50  |
|---------------------|-----|-----|-----|-----|-----|-----|-----|-----|
| Person-specific SEM |     |     |     |     |     |     |     |     |
| within              | .50 | .39 | .31 | .23 | .27 | .29 | .18 | .14 |
| between             | .98 | .76 | .62 | .52 | .47 | .34 | .23 | .18 |
| Conditional SEM     |     |     |     |     |     |     |     |     |
| within              | .37 | .29 | .20 | .17 | .15 | .13 | .07 | .05 |
| between             | .33 | .25 | .21 | .19 | .17 | .12 | .09 | .07 |

Appendix F.

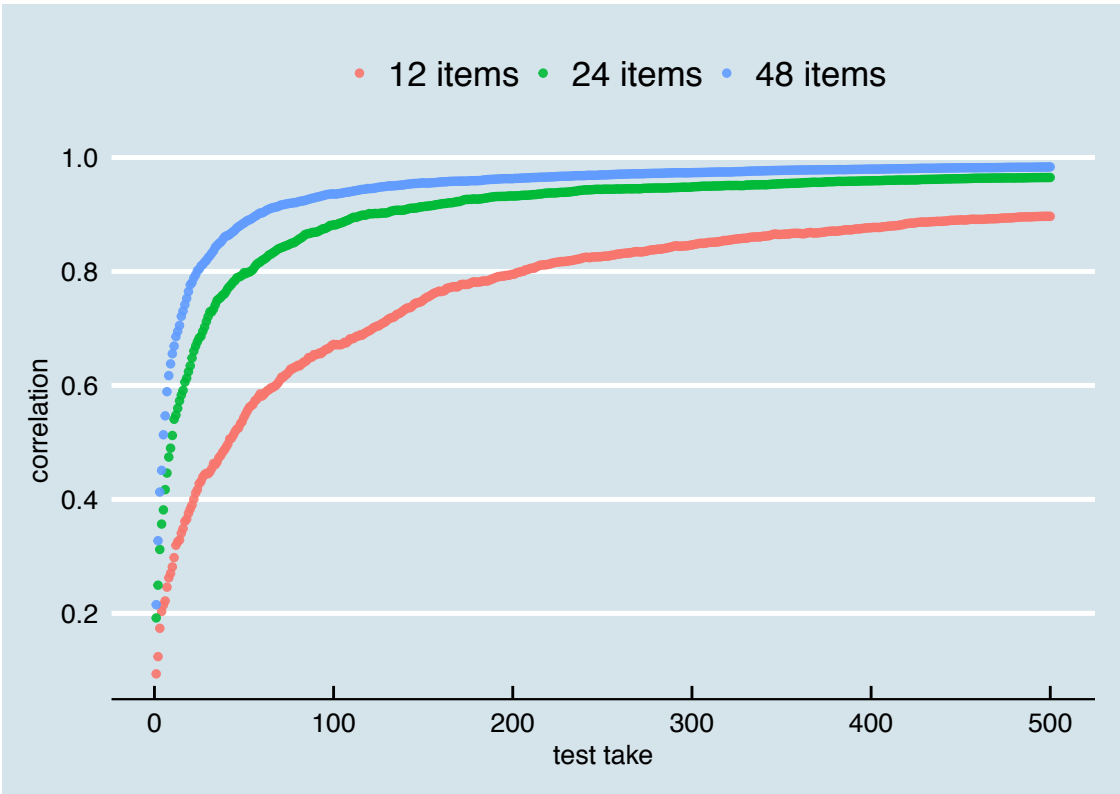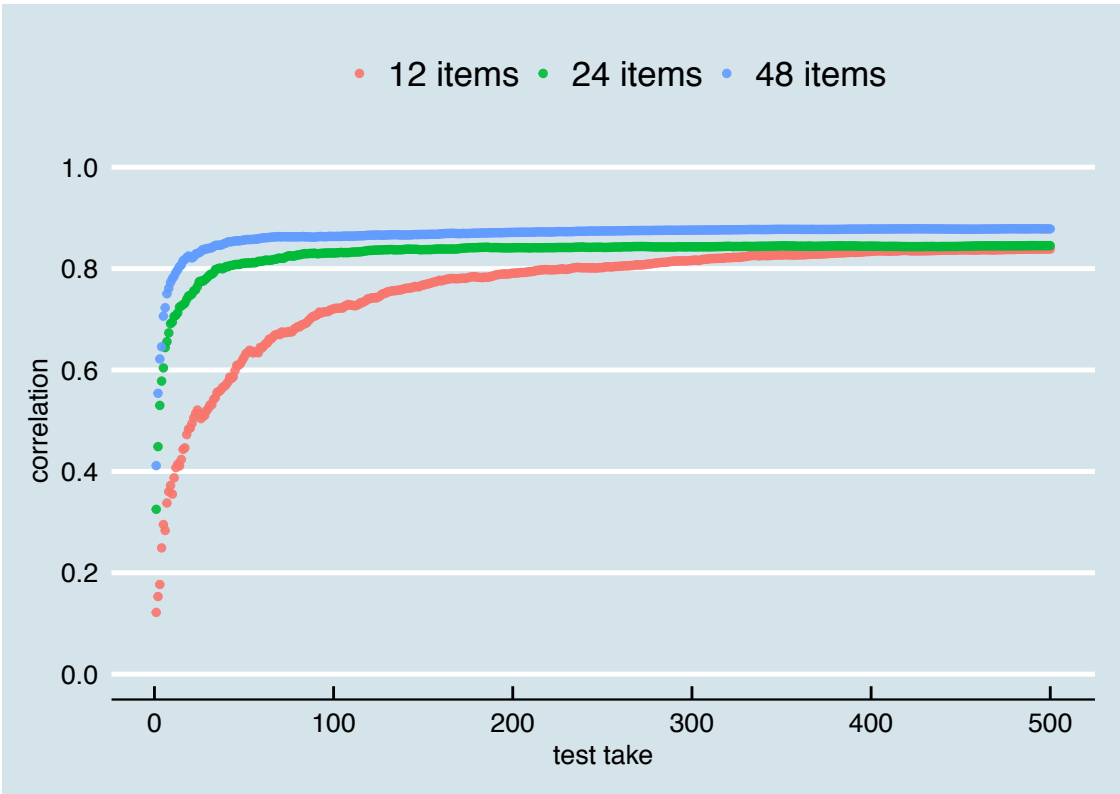

Supplement: Supplementary file 1 [file 20322252]
